# Supplementary material for: A Systematic Review and Meta-Analysis of the Effects of Flavanol-Containing Tea, Cocoa and Apple Products on Body Composition and Blood Lipids: Exploring the Factors Responsible for Variability in Their Efficacy
Source: MDPI journal article supplement (doi:10.3390/nu9070746), 2017-07-13
Supplement: s1 [file s1]

**Table S4.-** Overall effect size estimations (DM) for the impact of flavanols containing products on BMI, WC and blood lipids levels.

|                            | n   | N <sub>T</sub> | N <sub>S</sub> | N <sub>C</sub> | Overall effect size (DM) | 95% CI         | P-value |
|----------------------------|-----|----------------|----------------|----------------|--------------------------|----------------|---------|
| BMI (kg/m <sup>2</sup> )   | 67  | 3726           | 1913           | 1813           | -0.146                   | -0.252, -0.041 | 0.006   |
| WC (cm)                    | 46  | 2875           | 1478           | 1397           | -1.671                   | -2.432, -0.909 | <0.001  |
| Total-cholesterol (mmol/L) | 103 | 5190           | 2671           | 2519           | -0.134                   | -0.217, -0.050 | 0.002   |
| LDL-cholesterol (mmol/L)   | 99  | 5268           | 2697           | 2571           | -0.170                   | -0.251, -0.089 | <0.001  |
| HDL-cholesterol (mmol/L)   | 103 | 5328           | 2722           | 2606           | 0.032                    | -0.006, 0.071  | 0.099   |
| TAGs (mmol/L)              | 114 | 5561           | 2840           | 2721           | -0.031                   | -0.065, 0.004  | 0.083   |

DM: Difference in means; BMI: Body Mass Index; WC: Waist Circumference; LDL: Low density Lipoprotein; HDL: High Density

Lipoprotein; TAGs: Triacylglycerides; n: total number of studies included in the analysis; N<sub>T</sub>: number of total participants; N<sub>S</sub>: number of participants in the supplemented group; N<sub>C</sub>: number of participants in the control group; DM: Difference in Means (absolute values); 95% CI: lower and upper confidence limits; *P*-value < 0.05 was considered significant; *P*-value < 0.1 and ≥ 0.05 was considered marginally significant.
