# Supplementary material for: A Systematic Review and Meta-Analysis of the Effects of Flavanol-Containing Tea, Cocoa and Apple Products on Body Composition and Blood Lipids: Exploring the Factors Responsible for Variability in Their Efficacy
Source: MDPI journal article supplement (doi:10.3390/nu9070746), 2017-07-13
Supplement: s1 [file s1]

**Table S1.-** Mean content (mg/100 g fresh weight, f.w., or mg/100 mL) in flavonoids of green and black tea infusions, cocoa powder and whole apple illustrative of the composition of the three main sources of flavanols examined in this study: tea, cocoa and apple (data are based on the Phenol-Explorer database).

| Flavonoids        |                                                          | Green Tea Infusion (mg/100 mL) | Black Tea Infusion (mg/100 mL) | Cocoa Powder (mg/100 g f.w.) | Apple [Cider] peeled (mg/100 g f.w.) |
|-------------------|----------------------------------------------------------|--------------------------------|--------------------------------|------------------------------|--------------------------------------|
| Flavanols         | (+)-Catechin                                             | 0.70                           | 2.45                           | 107.75                       | 5.56                                 |
|                   | (+)-Catechin 3-O-gallate                                 | -                              | 4.74                           | -                            | -                                    |
|                   | (+)-Gallocatechin                                        | 2.26                           | 14.01                          | -                            | -                                    |
|                   | (+)-Gallocatechin 3-O-gallate                            | 0.47                           | 0.67                           | -                            | -                                    |
|                   | (-)-Epicatechin                                          | 7.93                           | 3.94                           | 158.30                       | 28.67                                |
|                   | (-)-Epicatechin-(2a-7)(4a-8)-epicatechin 3-O-galactoside | -                              | -                              | 5.00                         | -                                    |
|                   | (-)-Epicatechin 3-O-gallate                              | 7.50                           | 7.34                           | -                            | -                                    |
|                   | (-)-Epigallocatechin                                     | 19.68                          | 7.19                           | -                            | -                                    |
|                   | (-)-Epigallocatechin 3-O-gallate                         | 27.16                          | 9.12                           | -                            | -                                    |
|                   | Cinnamtannin A2                                          | -                              | -                              | 33.17                        | -                                    |
|                   | Procyanidins (dimers, trimers)                           | 5.48                           | 11.38                          | 207.4                        | 26.02                                |
|                   | <b>TOTAL</b>                                             | <b>71.18</b>                   | <b>60.84</b>                   | <b>511.62</b>                | <b>60.25</b>                         |
| Flavonols         | Kaempferol                                               | -                              | 0.00636                        | -                            | -                                    |
|                   | Kaempferol 3-O-galactoside                               | 0.42                           | 0.35                           | -                            | -                                    |
|                   | Kaempferol 3-O-glucoside                                 | 1.29                           | 0.90                           | -                            | -                                    |
|                   | Kaempferol 3-O-glucosyl-rhamnosyl-galactoside            | -                              | 0.28                           | -                            | -                                    |
|                   | Kaempferol 3-O-glucosyl-rhamnosyl-glucoside              | -                              | 0.67                           | -                            | -                                    |
|                   | Kaempferol 3-O-rutinoside                                | 0.95                           | 1.32                           | -                            | -                                    |
|                   | Quercetin                                                | -                              | 0.00364                        | -                            | -                                    |
|                   | Quercetin 3-O-arabinoside                                | -                              | 0.02                           | -                            | -                                    |
|                   | Quercetin 3-O-galactoside                                | 0.97                           | 0.73                           | -                            | 0.00829                              |
|                   | Quercetin 3-O-glucoside                                  | -                              | 1.31                           | -                            | 0.06                                 |
|                   | Quercetin 3-O-glucosyl-rhamnosyl-galactoside             | -                              | 0.67                           | -                            | -                                    |
|                   | Quercetin 3-O-glucosyl-rhamnosyl-glucoside               | -                              | 1.10                           | -                            | -                                    |
|                   | Quercetin 3-O-rhamnoside                                 | -                              | 0.06                           | -                            | 0.22                                 |
|                   | Quercetin 3-O-rhamnosyl-galactoside                      | 0.20                           | 0.27                           | -                            | -                                    |
|                   | Quercetin 3-O-rutinoside                                 | 1.46                           | 1.62                           | -                            | -                                    |
|                   | <b>TOTAL</b>                                             | <b>5.29</b>                    | <b>9.31</b>                    | <b>-</b>                     | <b>0.29</b>                          |
| Dihydro chalcones | Phloretin 2'-O-xylosyl-glucoside                         | -                              | -                              | -                            | 3.28                                 |
|                   | Phloridzin                                               | -                              | -                              | -                            | 2.50                                 |
|                   | <b>TOTAL</b>                                             | <b>-</b>                       | <b>-</b>                       | <b>-</b>                     | <b>5.78</b>                          |
