# Supplementary material for: A Systematic Review and Meta-Analysis of the Effects of Flavanol-Containing Tea, Cocoa and Apple Products on Body Composition and Blood Lipids: Exploring the Factors Responsible for Variability in Their Efficacy
Source: MDPI journal article supplement (doi:10.3390/nu9070746), 2017-07-13
Supplement: s1 [file s1]

**Table S2.-** Results of the meta-regression of the changes (SDM) in BMI, WC and blood lipids levels vs. duration of the supplementation with the flavanol-containing tea, cocoa or apple products.

|                            | BMI             | WC               | Total-cholesterol | LDL-cholesterol  | HDL-cholesterol | TAGs             |
|----------------------------|-----------------|------------------|-------------------|------------------|-----------------|------------------|
| Slope                      | -0.0007         | -0.0028          | -0.0064           | -0.0066          | 0.0038          | -0.0044          |
| SE                         | 0.0008          | 0.0013           | 0.0012            | 0.0014           | 0.0010          | 0.0009           |
| 95% CI                     | -0.0023, 0.0008 | -0.0054, -0.0002 | -0.0088, -0.0040  | -0.0093, -0.0039 | 0.0018, 0.0058  | -0.0061, -0.0026 |
| 2-sided<br><i>P</i> -value | 0.350           | 0.032            | <0.001            | <0.001           | <0.001          | <0.001           |
| Number of<br>studies       | 60              | 68               | 154               | 141              | 145             | 166              |

SDM: Standard difference in means; BMI: Body Mass Index; WC: Waist Circumference; LDL: Low density Lipoprotein; HDL: High Density Lipoprotein; TAGs: Triacylglycerides; Slope: Regression Coefficient; SE: Standard Error; 95% CI: lower and upper confidence limits; *P*-value < 0.05 was considered significant.
