# Supplementary material for: A Systematic Review and Meta-Analysis of the Effects of Flavanol-Containing Tea, Cocoa and Apple Products on Body Composition and Blood Lipids: Exploring the Factors Responsible for Variability in Their Efficacy
Source: MDPI journal article supplement (doi:10.3390/nu9070746), 2017-07-13
Supplement: s1 [file s1]

**Table S3.-** Summary of recent meta-analysis looking at the effects of flavanol-containing tea or cocoa products on anthropometric measurements and blood lipids associated with the development of metabolic disorders.

| Product                                      | Maximum number of studies | Maximum number of participants | BMI        | WC (cm)    | Total cholesterol (mmol/L) | LDL (mmol/L) | HDL (mmol/L) | TAGs (mmol/L) | References |
|----------------------------------------------|---------------------------|--------------------------------|------------|------------|----------------------------|--------------|--------------|---------------|------------|
| <i>Tea products meta-analyses</i>            |                           |                                |            |            |                            |              |              |               |            |
| Various types of tea or tea extracts         | 13                        | 665                            | -0.15 (NS) | -1.01 (NS) | -0.05 (NS)                 | 0.07 (NS)    | 0.01 (NS)    | -0.11 (NS)    | [136]      |
| Black tea                                    | 10                        | 411                            | NR         | NR         | -0.05 (NS)                 | -0.12 (S)    | 0.03 (NS)    | NR            | [137]      |
| Various types of tea or tea extracts         | 4                         | 302                            | -0.72 (S)  | -1.53 (NS) | NR                         | NR           | NR           | NR            | [138]      |
| Black tea extracts, leafs                    | 12                        | -                              | NR         | NR         | NE                         | -0.12 (NS)   | NE           | NR            | [139]      |
| Green tea extracts or drinks                 | 20                        | 1536                           | NR         | NR         | -0.13 (S)                  | -0.19 (S)    | -0.01 (NS)   | -0.02 (NS)    | [140]      |
| Green tea extracts or drinks                 | 5                         | 301                            | -0.31 (NS) | 0.08 (NS)  | NR                         | NR           | NR           | NR            | [141]      |
| Green tea extracts or drinks                 | 11                        | 927                            | -0.06 (NS) | NR         | -0.15 (S)                  | -0.16 (S)    | 0.01 (NS)    | 0.10 (NS)     | [142]      |
| Green and black tea, extracts                | 8                         | 821                            | NR         | NR         | NR                         | -0.48 (S)    | 0.00 (NS)    | -0.06 (NS)    | [143]      |
| Green tea extracts or drinks                 | 20                        | 1415                           | NR         | NR         | -0.14 (S)                  | -0.14 (S)    | 0.01 (NS)    | 0.03 (NS)     | [144]      |
| Green tea extracts or drinks                 | 14                        | 1136                           | NR         | NR         | -0.19 (S)                  | -0.06 (S)    | 0.25 (NS)    | NR            | [145]      |
| Green tea extracts or drinks (with caffeine) | 15                        | 1243                           | -0.55 (S)  | -1.93 (S)  | NR                         | NR           | NR           | NR            | [146]      |
| <i>Cocoa products meta-analyses</i>          |                           |                                |            |            |                            |              |              |               |            |
| Dark chocolate/cocoa products                | 10                        | 320                            | NR         | NR         | -0.16 (S)                  | -0.15 (S)    | 0.02 (NS)    | -0.06 (NS)    | [147]      |
| Cocoa, chocolate bars or beverages           | 20                        | 1131                           | NR         | NR         | -0.07 (MS)                 | -0.26 (MS)   | 0.06 (S)     | -0.10 (S)     | [148]      |
| Chocolate and cocoa flavanols                | 21                        | 986                            | NR         | NR         | -0.04 (NS)                 | -0.07 (MS)   | 0.03 (MS)    | -0.05 (S)     | [149]      |

BMI: Body Mass Index; WC: Waist Circumference; LDL: Low density Lipoprotein; HDL: High Density Lipoprotein; TAGs: Triacylglycerides; NR: Not reported; NE: No effect; S: Significant ( $P < 0.05$ , dark shaded); MS: Marginally significant ( $P < 0.1$  and  $\geq 0.05$ ); NS: Not significant.
